# Supplementary material for: Surface functionalized halloysite nanotubes decorated with silver nanoparticles for enzyme immobilization and biosensing
Source: Royal Society of Chemistry journal article supplement (doi:10.1039/c6tb00051g), 2016-01-01
Supplement: c6tb00051g1.pdf [file c6tb00051g1.pdf]

## Supporting information

### **Surface functionalized halloysite nanotubes decorated with silver nanoparticles for enzyme immobilization and biosensing**

*Siva Kumar-krishnan,<sup>a\*</sup> A. Hernandez-Rangel,<sup>b</sup> Umapada Pal,<sup>c</sup> O. Ceballos-Sanchez,<sup>d</sup> F. J. Flores-Ruiz,<sup>e</sup> E. Prokhorov,<sup>b</sup> O. Arias de Fuentes,<sup>b,f</sup> Rodrigo Esparza,<sup>a</sup> and M. Meyyappan.<sup>g</sup>*

<sup>a</sup>Centro de Física Aplicada y Tecnología Avanzada, Universidad Nacional Autónoma de México, Boulevard Juriquilla 3001, Santiago de Querétaro, Qro., 76230, México.

<sup>b</sup>Cinvestav Querétaro, Querétaro QRO, 76230, México.

<sup>c</sup>Instituto de Física, Benemérita Universidad Autónoma de Puebla, Apdo. Postal J-48, Puebla 72570, México.

<sup>d</sup>Catedras Conacyt at Facultad de Ingeniería Civil, Departamento de Ecomateriales y Energía, Universidad Autónoma de Nuevo León (UANL), Ciudad Universitaria, San Nicolás de los Garza, Nuevo León C.P. 64451, México.

<sup>e</sup>Centro de Nanociencias y Nanotecnología-UNAM, Ensenada, BC, 22860, México.

<sup>f</sup>Instituto de Ciencia y Tecnología de Materiales, Universidad de La Habana, 10400, Cuba.

<sup>g</sup>NASA Ames Research Center, Moffett Field, CA 94035, USA.

\* Corresponding Author: skumar@fata.unam.mx

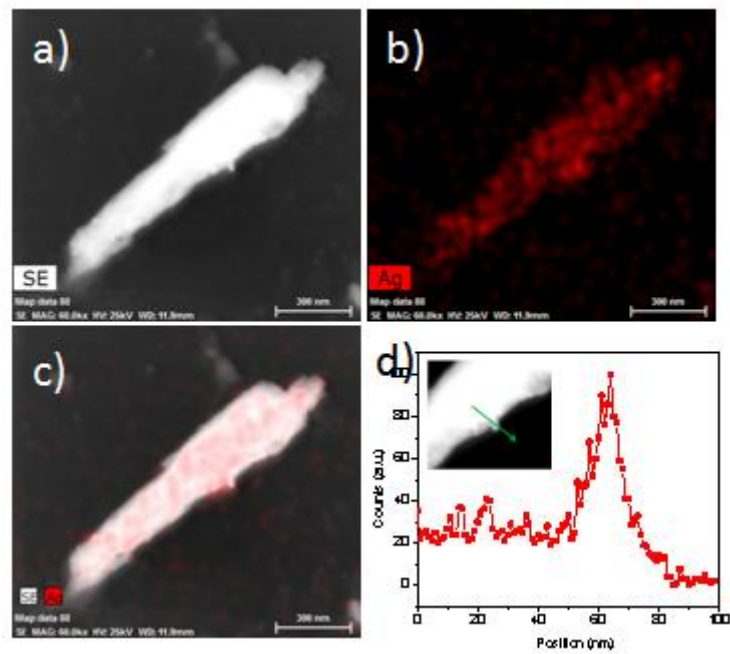

**Figure S1.** Structural and elemental analysis of HNT/AgNP hybrid composite. **a)** HAADF-STEM image of HNT/AgNPs. **b, c)** EDS- elemental mapping showing Ag (red), overlapped HNT/Ag. **d)** EDS line-scan across an AgNP. The inset in (d) shows the scanned AgNP on the HNT. Scale bar, 300 nm.

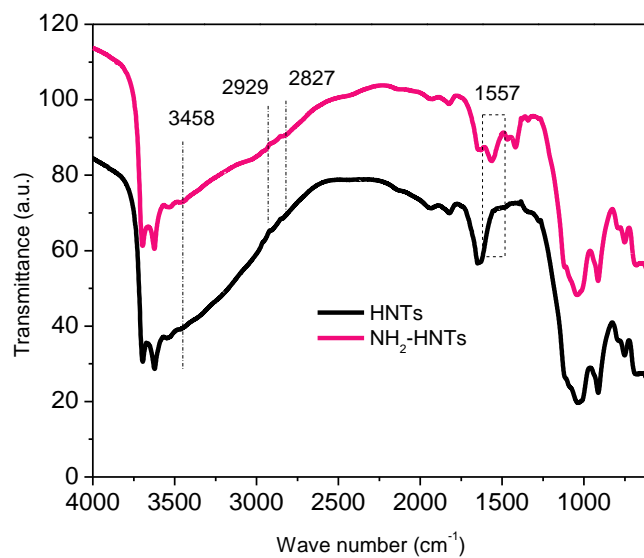

**Figure S2.** FTIR spectra of HNTs and amine-modified NH<sub>2</sub>-HNTs.

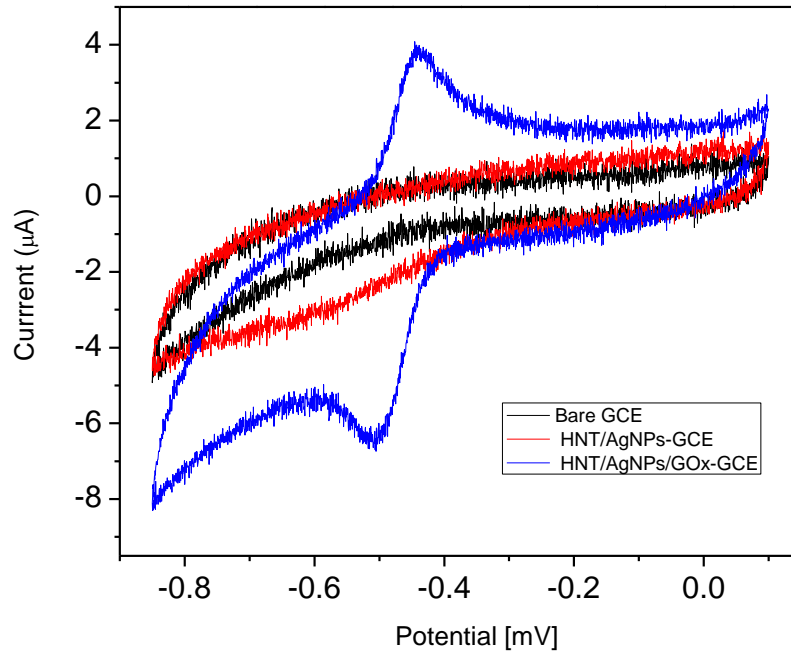

**Figure S3.** C-V plots of bare GCE, HNT/AgNP-GCE, and HNT/AgNP/GOx modified electrodes measured in 0.1 M nitrogen ( $N_2$ ) saturated PBS solution (PH=7.4) at a scan rate of  $50 \text{ mV s}^{-1}$ .
